lem, the author discusses rather generally various aspects of what a research problem should entail, emphasizing proper use of library facilities. There is also a brief discussion of statistics.

Separate chapters are devoted to problems concerning illustrations, tables and graphs. These chapters are informative and of considerable benefit in solving the perennial problem of how to best present data.

The information varies from very specific and factual matter concerning the construction of graphs to nonspecific information which is best exemplified by the following sentence (taken from a paragraph concerning the arrangement of topics); "Choose a logical se-

quence of topics, based upon a careful analysis of the subject matter." This sentence is of questionable value in a manual. One could hardly be expected to believe he would choose an illogical sequence of topics based upon a careless analysis of subject matter.

The information presented in this type book does not lend itself well to statements concerning reliability. The current reviewer is not qualified to compare it with other books in the field. It does appear to be a source of reference which would be of value to those interested in writing scientific papers, especially beginners in the area of scientific writing.

WILLIAM K. HAMILTON, M.D.

### BOOKS RECEIVED

The receipt of the following books is acknowledged, and this listing must be regarded as sufficient return for the courtesy of the sender.

*Actualidad Médica*. Vol. 1, No. 1, February 1960. Bimonthly scientific publication of the Asociacion Medica de Occidente, C.A. Annual subscription \$100.00 (Mexican pesos). Scientific coordinator, Dr. Héctor Huizar Lara; Director, Dr. Francisco Javier López, M. Correspondence should be sent to Dr. F. Garcia-Ruiz, President of the Asociacion Medica de Occidente, A.C., and member of the editorial council, Gonzalez Ortega 23, Guadalajara, Jalisco, Mexico.

**L'Anesthésie en Chirurgie Thoracique—d'Après 7000 Cas Opérés de 1934 à 1954—Évolution des Techniques les Méthodes et Leurs Indications Statistique.** BY OLIVIER MONOD, MICHEL HERBEAU, GENEVIÈVE DELAHAYE, GEORGES CHESNEAU, ANDRÉ JUVENELLE, PIERRE GAUTHIER-LAFAYE. Paper. Pp. 122, with illustrations. Masson and C<sup>ie</sup>, Editors, Libraires de L'Académie de Médecine, 120 Boulevard Saint-Germain, Paris, 1955.

**Emergency Treatment and Management.** BY THOMAS FLINT, JR., M.D., Director, Division of Industrial Relations, Permanente Medical Group, Oakland and Richmond, California;

Chief, Emergency Department, Permanente Medical Group, Kaiser Foundation Hospital, Richmond, California. Second Edition. Cloth. \$8.00. Pp. 539. W. B. Saunders Co., Philadelphia and London, 1958.

**Le Laryngologiste et les Données Actuelles du Traitement des Insuffisances Respiratoires Aiguës.** BY P. ABOULKER, with the collaboration of J. Lissac and O. Saint-Paul. Société Française d'Oto-Rhino-Laryngologie. Paper. 6,000 frs. Pp. 508, with 103 illustrations. Librairie Arnette, 2 rue Casimir-Delavigne, Paris, 1959.

**Nurses Can Give and Teach Rehabilitation.** BY MILDRED J. ALLGIRE, R.N., R.P.T., M.A., AND RUTH R. DENNY, R.N., R.P.T., B.S. Paper. \$1.25. Pp. 61, with 36 illustrations. Springer Publishing Company, Inc., 44 East 23rd St., New York, 1960.

**Xylocaine—The Pharmacological Basis of Its Clinical Use.** First Edition. BY STEN WIEDLING, The Research Laboratories of A. B. Astra, Södertälje, Sweden. Foreword by Dr. Torsten Gordh. Cloth. Pp. 146, with 24 figures, 9 tables, and over 900 references. Almqvist & Wiksells Boktryckeri A.B., Uppsala, Sweden, 1959. Available on request from Astra Pharmaceutical Products, Inc., Worcester, Massachusetts.
